# Supplementary material for: The Unique Carboxymethyl Fenugreek Gum Gel Loaded Itraconazole Self-Emulsifying Nanovesicles for Topical Onychomycosis Treatment
Source: MDPI journal article supplement (doi:10.3390/polym14020325), 2022-01-14
Supplement: s1 [file s1]

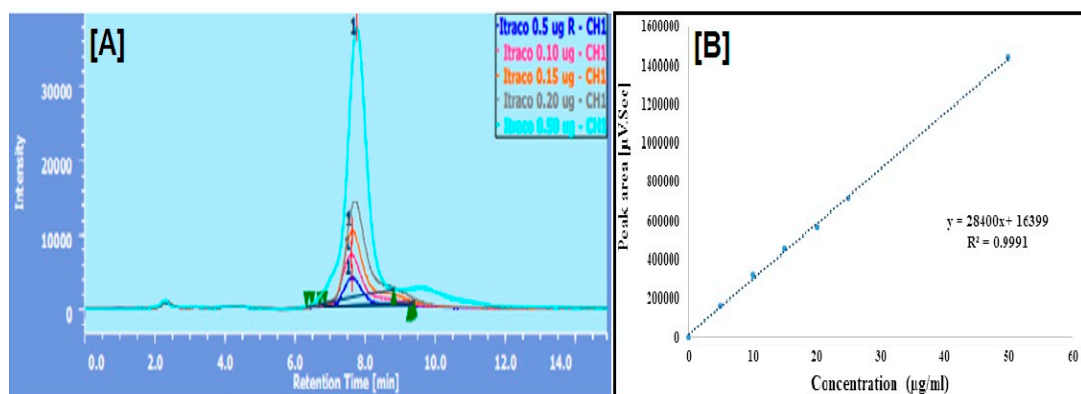

**Figure S1.** (A) Quantification chromatogram of ITZ, and (B) standard calibration curve of ITZ.

**Table S1.** Peak area of ITZ at different concentration.

| Sr. No. | Concentration (μg/mL) | Peak area [μV.sec] |
|---------|-----------------------|--------------------|
| 1       | 0                     | 0                  |
| 2       | 5                     | 164355             |
| 3       | 10                    | 320959             |
| 4       | 15                    | 454341             |
| 5       | 20                    | 569434             |
| 6       | 25                    | 716822             |
| 7       | 50                    | 1438885            |

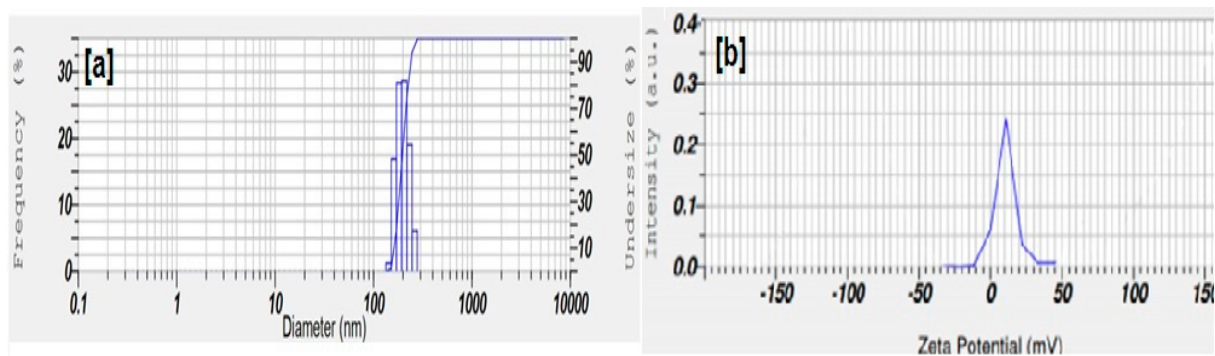

**Figure S2.** (a) PS and PDI, (b) ZP of S3.
